# Supplementary material for: Updraft dynamics and microphysics: on the added value of the cumulus thermal reference frame in simulations of aerosol-deep convection interactions
Source: Copernicus journal article supplement (doi:10.5194/acp-2021-586), 2021-07-19
Supplement: Supplementary file [file acp-2021-586-AC1-supplement.pdf]

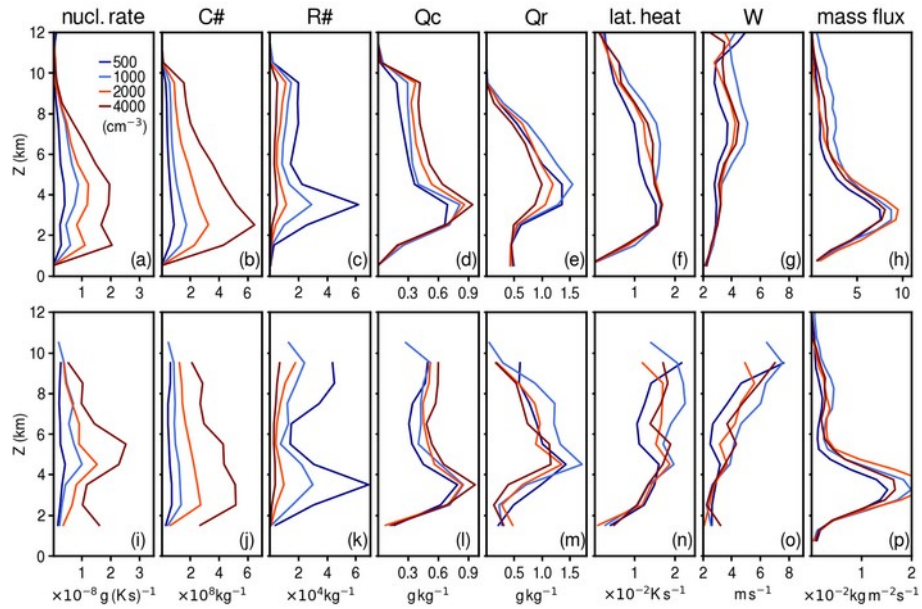

Fig. S1: As in Fig. 4, but for the early stage of the simulation, between 21:00 UTC and 21:45 UTC.

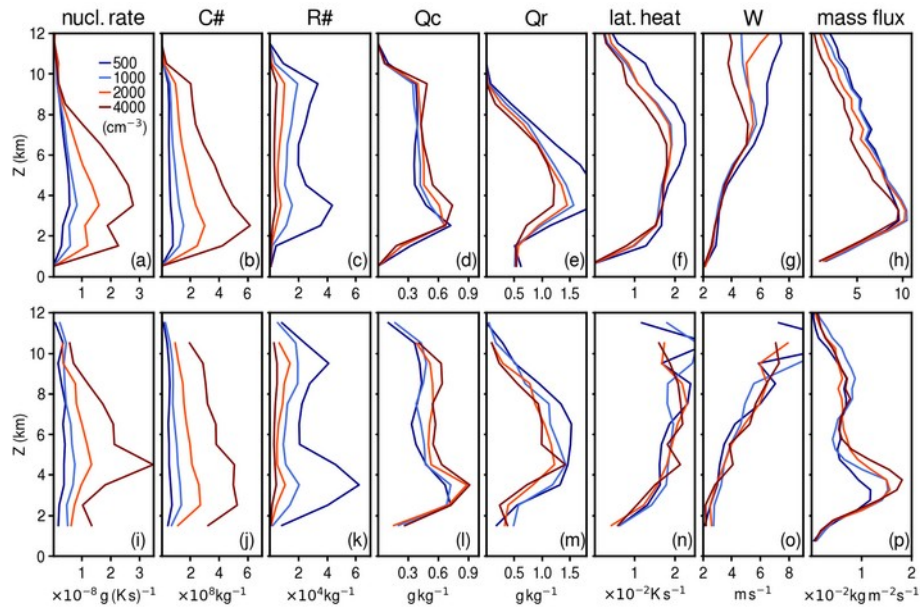

Fig. S2: As in Fig. 4, but for the middle stage of the simulation, between 22:00 UTC and 22:45 UTC.

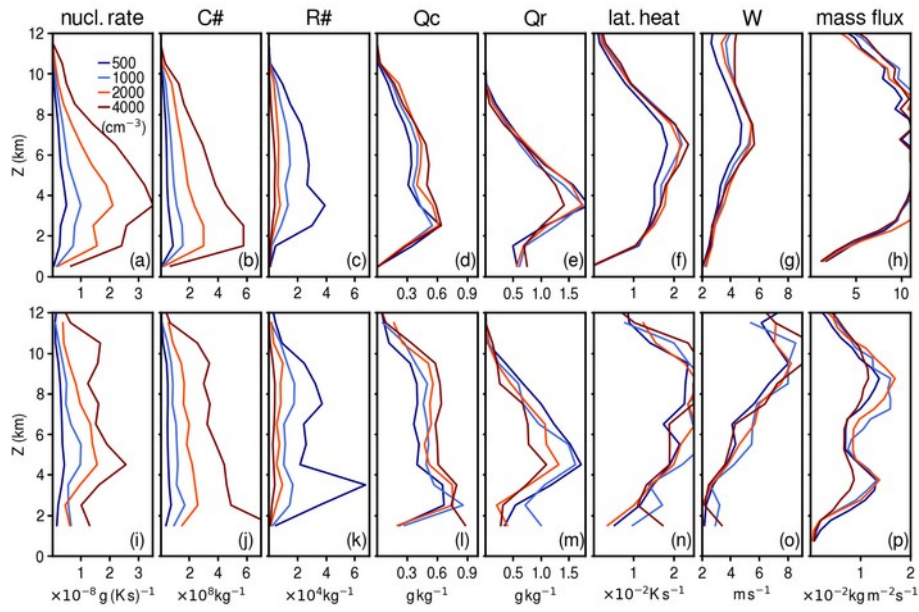

Fig. S3: As in Fig. 4, but for the later stage of the simulation, between 23:00 UTC and 23:45 UTC.

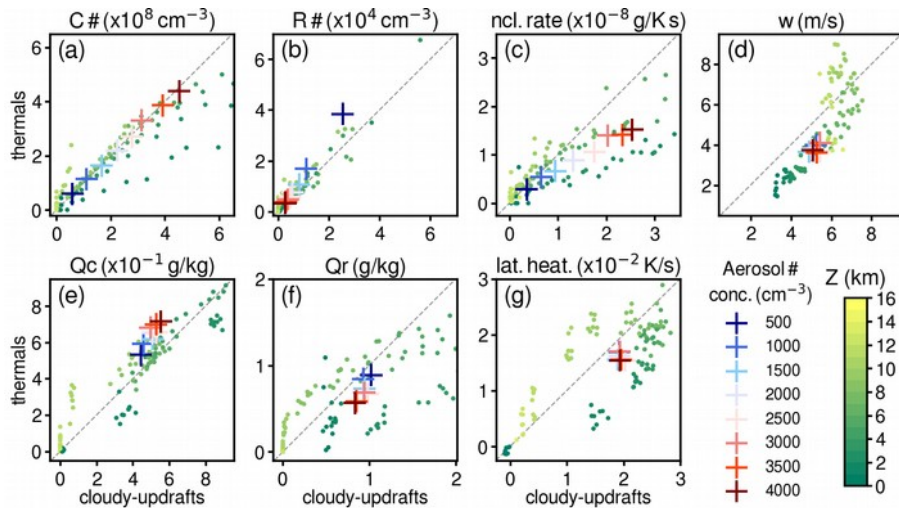

Fig. S4: As in Fig. 7, but using  $w > 2$  m/s for the cloud updraft grid point definition.

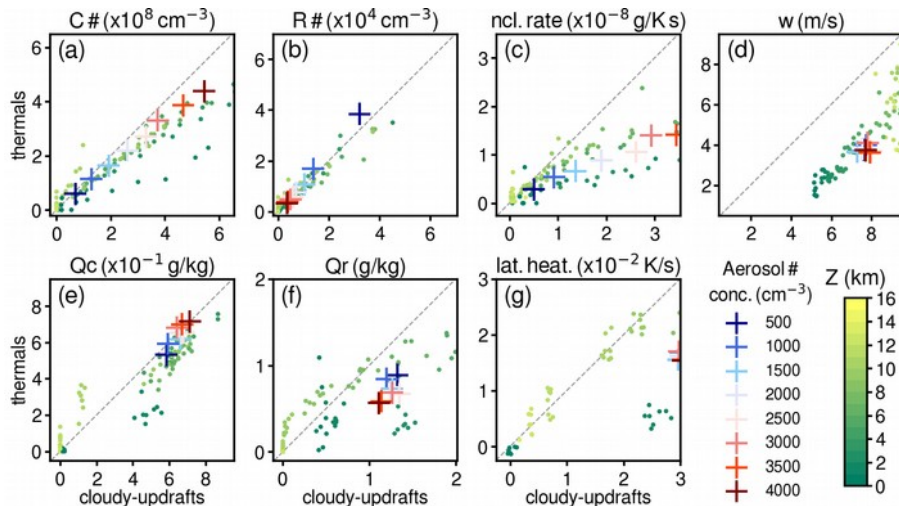

Fig. S5: As in Fig. 7, but using  $w > 4$  m/s for the cloud updraft grid point definition.
